# Supplementary material
Source: publisher figshare collection journal article supplement (https://tandf.figshare.com/ndownloader/files/30774162)
Supplement: Supplementary file 1 [file 30774162]

Country name	ISO3	Historic emissions - 2010, PRIMAPhist [MtCO2e]	Below 1.8C (with 66% probability) [MtCO2e]	Below 1.8C (with 66% probability) [% of 2010]	Below 1.5C in 2100 and peak below 1.7C [MtCO2e]	Below 1.5C in 2100 and peak below 1.7C [% of 2010]	Intl law fair-share minimum 2030 [MtCO2e]	Intl law fair-share maximum 2030 [MtCO2e]	Intl law fair-share minimum 2030 [% of 2010]	Intl law fair-share maximum 2030 [% of 2010]	Full literature range minimum 2030 [MtCO2e]	Full literature range maximum 2030 [MtCO2e]	Full literature range minimum 2030 [% of 2010]	Full literature range maximum 2030 [% of 2010]
Aruba	ABW	2.61	1.53	58.66	1.23	47.26	0.6	2.71	22.92	103.79	0.6	2.71	23.14	103.79
Afghanistan	AFG	28.7	84.29	293.69	63.77	222.2	19.97	165.5	69.57	576.64	19.97	162.03	69.58	564.55
Angola	AGO	97.1	91.2	93.92	73.38	75.57	35.34	161.71	36.4	166.54	35.34	161.71	36.4	166.54
Anguilla	AIA	0.16	0.1	67.07	0.1	65.56	0.1	0.11	62.32	73.07	0.1	0.11	62.32	73.07
Albania	ALB	8.91	7.67	86.1	6.34	71.12	3.49	12.95	39.15	145.39	3.8	12.91	42.6	144.89
Andorra	AND	0.62	0.16	26.18	0.08	13.41	-0.09	0.48	-13.85	76.71	-0.09	0.47	-13.85	75.86
United Arab Emirates	ARE	204	121.01	59.32	100.9	49.46	57.95	200.63	28.41	98.35	58.47	200.63	28.66	98.35
Argentina	ARG	316	190.56	60.3	161.72	51.18	100.16	304.69	31.7	96.42	100.16	300.87	31.7	95.21
Armenia	ARM	8.5	7.85	92.38	6.44	75.81	3.44	13.43	40.43	157.96	3.57	13.34	42.04	156.9
Antigua and Barbuda	ATG	0.65	0.18	27.87	0.09	13.92	-0.1	0.54	-15.84	83.04	-0.16	0.54	-24.68	83.04
Australia	AUS	540	252.03	46.67	200.21	37.08	89.59	457.1	16.59	84.65	89.59	454.64	16.59	84.19
Austria	AUT	86	-4.84	-5.63	-20.73	-24.11	-54.65	58.04	-63.55	67.49	-54.25	57.82	-63.08	67.23
Azerbaijan	AZE	55.9	40.23	71.97	33.53	59.98	19.22	66.75	34.38	119.42	19.84	66.29	35.48	118.59
Burundi	BDI	5.42	163.25	3011.93	113.2	2088.48	6.35	361.32	117.14	6666.44	5.21	361.32	96.1	6666.44
Belgium	BEL	134	-12.32	-9.19	-36.31	-27.09	-87.52	82.63	-65.31	61.66	-87.52	85.1	-65.31	63.51
Benin	BEN	13.1	74.61	569.56	54.57	416.6	11.8	153.91	90.07	1174.87	10.95	153.91	83.58	1174.87
Burkina Faso	BFA	28.8	252.86	877.99	180.48	626.66	25.96	539.31	90.13	1872.61	21.79	539.31	75.66	1872.61
Bangladesh	BGD	120	467.48	389.56	323.74	269.79	16.91	1036.29	14.09	863.58	16.91	1036.29	14.09	863.58
Bulgaria	BGR	61	33.28	54.55	28.44	46.62	18.11	52.42	29.69	85.94	18.11	53.25	29.69	87.29
Bahrain	BHR	37.2	24.26	65.22	19.69	52.94	9.94	42.34	26.72	113.83	9.97	41.66	26.81	111.98
Bahamas	BHS	2.38	-0.71	-29.93	-1.5	-62.96	-3.18	2.4	-133.46	100.78	-3.18	2.39	-133.46	100.51
Bosnia and Herzegovina	BIH	26.9	21.03	78.19	17.51	65.09	9.99	34.98	37.13	130.03	10.21	34.97	37.95	130
Belarus	BLR	99.5	57.93	58.22	49.41	49.66	31.22	91.66	31.38	92.12	29.78	92.52	29.93	92.99
Belize	BLZ	0.92	1.1	119.54	0.95	102.97	0.62	1.7	67.62	185.08	0.61	1.7	66.8	185.08
Bolivia	BOL	72.3	77.54	107.24	66.31	91.71	42.34	121.97	58.56	168.7	46.84	121.97	64.79	168.7
Brazil	BRA	1010	875.06	86.64	773.49	76.58	556.65	1277.04	55.11	126.44	573.46	1245.51	56.78	123.32
Barbados	BRB	1.65	0.72	43.41	0.43	26.16	-0.18	1.84	-10.66	111.67	-0.18	1.84	-10.66	111.65
Brunei Darussalam	BRN	14	0.87	6.24	-1.87	-13.35	-7.72	11.73	-55.17	83.77	-7.72	11.73	-55.17	83.78
Bhutan	BTN	1.88	2.86	152.34	2.44	129.98	1.55	4.53	82.26	240.8	1.44	4.56	76.85	242.68
Botswana	BWA	27.2	17.58	64.65	14.27	52.45	7.18	30.72	26.4	112.94	7.46	30.7	27.44	112.86
Central African Republic	CAF	9.27	15.45	166.69	7.7	83.06	-8.85	46.14	-95.49	497.69	-8.85	46.14	-95.49	497.69
Canada	CAN	699	288.4	41.26	235.77	33.73	123.42	496.69	17.66	71.06	123.42	520.87	17.66	74.52
Switzerland	CHE	54.1	-33.42	-61.78	-53.21	-98.36	-95.46	44.9	-176.46	82.99	-95.46	45.03	-176.46	83.23
Chile	CHL	92.4	62.23	67.34	52.34	56.65	31.24	101.34	33.81	109.68	31.24	101.2	33.81	109.53
China	CHN	11000	8407.02	76.43	7011.56	63.74	4032.61	13929.45	36.66	126.63	3540.45	13805.58	32.19	125.51
Cote d'Ivoire	CIV	21.5	139.05	646.73	102.37	476.16	24.09	284.18	112.04	1321.75	20.69	284.18	96.25	1321.75
Cameroon	CMR	43.1	76.21	176.81	58.25	135.14	19.91	147.28	46.18	341.73	19.91	147.28	46.18	341.73
Democratic Republic of Congo	COD	52.1	270.53	519.25	209.81	402.7	80.18	510.83	153.89	980.49	55.6	510.83	106.71	980.49
Congo	COG	14.8	19.53	131.96	15.86	107.14	8.02	34.07	54.16	230.18	8.02	34.07	54.16	230.18
Cook Islands	COK	0.09	0.03	34.23	0.01	16.44	-0.02	0.09	-21.53	104.63	-0.02	0.09	-21.53	104.63
Colombia	COL	147	133.96	91.13	103.64	70.5	38.91	253.95	26.47	172.76	38.91	253.86	26.47	172.7
Comoros	COM	0.6	4.74	792.08	3.37	563.65	0.45	10.14	76	1696.09	0.44	7.41	72.97	1239.12
Cabo Verde	CPV	0.85	1.24	146.58	0.94	111.01	0.3	2.44	35.09	287.34	0.3	2.73	35.09	321.93
Costa Rica	CRI	14.7	15.96	108.55	10.52	71.55	-1.09	37.48	-7.44	254.97	-1.09	37.47	-7.44	254.86
Cuba	CUB	50.5	-145.99	-289.09	-197.85	-391.79	-308.57	59.26	-611.03	117.35	-308.57	59.19	-611.03	117.2
Cyprus	CYP	9.64	4.36	45.22	3.52	36.49	1.72	7.69	17.85	79.78	1.72	7.71	17.85	79.94
Czechia	CZE	141	33.67	23.88	20.48	14.53	-7.66	85.84	-5.43	60.88	-7.66	92.94	-5.43	65.92
Germany	DEU	953	-132.57	-13.91	-313.53	-32.9	-699.83	583.57	-73.43	61.24	-699.83	585.77	-73.43	61.47
Djibouti	DJI	1.67	3.63	217.23	2.89	173.18	1.32	6.54	79.14	391.55	1.28	5.81	76.72	347.8
Dominica	DMA	0.22	0.19	85.36	0.15	67.35	0.06	0.35	28.9	156.65	0.06	0.35	28.9	156.65
Denmark	DNK	64.5	-12.5	-19.37	-25.75	-39.92	-54.04	39.95	-83.79	61.95	-54.04	40.9	-83.79	63.41
Dominican Republic	DOM	27.5	23.56	85.69	14.87	54.08	-3.68	57.96	-13.39	210.76	-3.68	57.92	-13.39	210.63
Algeria	DZA	200	192.06	96.03	165.77	82.89	109.65	296.1	54.83	148.05	115.38	295.81	57.69	147.9
Ecuador	ECU	64.6	72.78	112.67	60.78	94.08	35.14	120.31	54.39	186.24	35.14	120.14	54.39	185.98
Egypt	EGY	287	373.6	130.17	332.53	115.86	244.85	536.14	85.31	186.81	244.98	535.46	85.36	186.57
Eritrea	ERI	5.92	73.15	1235.61	50.73	856.86	2.86	161.88	48.33	2734.49	2.86	104.79	48.33	1770.02
Spain	ESP	362	36.06	9.96	-27.54	-7.61	-163.3	287.74	-45.11	79.49	-146.97	287.95	-40.6	79.54
Estonia	EST	21.8	9.02	41.39	7.14	32.74	3.11	16.49	14.26	75.65	3.11	16.67	14.26	76.46
Ethiopia	ETH	115	821.34	714.21	589.02	512.19	93.05	1740.77	80.91	1513.71	81.75	1740.77	71.09	1513.71
European Union (27)	EU27	4227.01	216.7	5.13	-470.76	-11.14	-1938.33	2937.31	-45.86	69.49	-1911.85	2971.13	-45.23	70.29
Finland	FIN	76.6	-1.92	-2.51	-12.55	-16.39	-35.25	40.15	-46.02	52.42	-35.25	41.29	-46.02	53.91
Fiji	FJI	2.46	2.3	93.65	1.82	73.9	0.78	4.23	31.74	171.82	0.78	4.23	31.74	171.8
France	FRA	520	-48.6	-9.35	-160.49	-30.86	-399.35	394.22	-76.8	75.81	-399.35	394.35	-76.8	75.84
Micronesia	FSM	0.18	0.34	189.37	0.3	164.83	0.2	0.52	112.43	286.51	0.2	0.52	113.03	286.51
Gabon	GAB	13.9	3.29	23.68	0.3	2.14	-6.09	15.14	-43.83	108.9	-6.09	16.14	-43.83	116.12
United Kingdom	GBR	623	-184.97	-29.69	-336.06	-53.94	-658.6	412.97	-105.71	66.29	-658.6	418.76	-105.71	67.22
Georgia	GEO	13.8	13.21	95.71	11.48	83.19	7.79	20.05	56.44	145.29	7.84	20.03	56.85	145.12
Ghana	GHA	23.5	133.04	566.12	96	408.49	16.92	279.63	72	1189.92	10.94	279.63	46.56	1189.92
Guinea	GIN	21.3	82.71	388.3	62.83	295	20.41	161.36	95.82	757.55	17.79	161.36	83.5	757.55
Gambia	GMB	2.41	8.26	342.54	6.19	256.91	1.79	16.42	74.12	681.41	1.65	16.42	68.44	681.41
Guinea-Bissau	GNB	2.38	9.76	410.2	7.07	296.9	1.31	20.43	55.04	858.56	1.31	20.43	55.04	858.56
Equatorial Guinea	GNQ	11.6	8.94	77.11	7.33	63.16	3.87	15.35	33.39	132.31	3.87	15.32	33.39	132.11
Greece	GRC	119	33.31	27.99	23.27	19.56	1.85	73.03	1.55	61.37	1.85	75.61	1.55	63.54
Grenada	GRD	0.33	0.05	14.2	-0.04	-11.91	-0.23	0.39	-67.67	117.56	-0.23	0.39	-67.67	117.56
Guatemala	GTM	27	59.62	220.82	45.81	169.68	16.33	114.27	60.49	423.24	16.33	114.27	60.49	423.24
Guyana	GUY	3.42	2.58	75.31	2.18	63.75	1.34	4.14	39.07	121.07	1.34	4.14	39.07	121
Hong Kong	HKG	44.7	-35.7	-79.87	-54.92	-122.87	-95.95	40.36	-214.66	90.29	-95.95	40.36	-214.66	90.29
Honduras	HND	16.4	30.73	187.4	24.9	151.82	12.44	53.83	75.86	328.21	12.17	53.83	74.18	328.21
Croatia	HRV	28.9	7.17	24.81	3.93	13.6	-2.98	19.99	-10.33	69.18	-2.98	20.29	-10.33	70.19
Haiti	HTI	12.8	57.12	446.22	44.03	343.95	16.08	108.92	125.63	850.95	15.52	74.99	121.28	585.86
Hungary	HUN	65.4	15.81	24.17	7.41	11.32	-10.53	49.07	-16.11	75.02	-10.15	48.94	-15.52	74.83
Indonesia	IDN	722	808.61	112	667.2	92.41	365.32	1368.24	50.6	189.51	380.07	1365.8	52.64	189.17
India	IND	2260	3744.69	165.69	3248.65	143.75	2189.73	5707.73	96.89	252.55	1834.73	5502.54	81.18	243.48
Ireland	IRL	62.5	3.11	4.97	-6.97	-11.14	-28.47	42.97	-45.55	68.76	-20.54	43.12	-32.86	68.99
Iran	IRN	778	563.99	72.49	495.08	63.64	347.99	836.69	44.73	107.54	338.18	830.29	43.47	106.72
Iraq	IRQ	178	261.91	147.14	226.02	126.98	149.41	403.93	83.94	226.93	144.8	403.27	81.35	226.56
Iceland	ISL	4.87	1.66	34.12	1.15	23.59	0.05	3.69	1.12	75.79	0.05	3.76	1.12	77.14
Israel	ISR	83	48.03	57.86	37.61	45.31	15.37	89.26	18.51	107.54	18.35	89.26	22.1	107.54
Italy	ITA	511	16.38	3.21	-72.02	-14.09	-260.72	366.2	-51.02	71.66	-260.27	366.16	-50.93	71.66
Jamaica	JAM	9.5	6.74	71	4.2	44.16	-1.25	16.83	-13.13	177.2	-1.25	16.82	-13.13	177.08
Jordan	JOR	27.8	39.64	142.57	34.39	123.71	23.2	60.39	83.44	217.22	22.05	60.39	79.31	217.22
Japan	JPN	1310	133.59	10.2	-63.72	-4.86	-484.94	914.45	-37.02	69.81	-381.68	1234.62	-29.14	94.25
Kazakhstan	KAZ	306	258.11	84.35	203.9	66.63	88.17	472.65	28.81	154.46	92.77	461.27	30.32	150.74
Kenya	KEN	62.2	178.25	286.57	135.26	217.46	43.49	348.37	69.92	560.08	41.96	348.37	67.46	560.08
Kyrgyzstan	KGZ	14.1	19.11	135.53	15.75	111.71	8.58	32.4	60.86	229.79	8.58	32.4	60.86	229.78
Cambodia	KHM	31.7	39.89	125.84	35.94	113.36	27.49	55.55	86.72	175.24	26.83	55.55	84.64	175.24
Kiribati	KIR	0.11	0.29	273.26	0.22	209.44	0.08	0.56	73.21	525.81	0.08	0.56	74.8	520.3
Saint Kitts and Nevis	KNA	0.26	0.15	55.91	0.11	40.71	0.02	0.31	8.25	116.09	0.02	0.31	8.25	115.76
South Korea	KOR	672	225.52	33.56	160.77	23.92	22.53	481.79	3.35	71.69	22.98	485.13	3.42	72.19
Kuwait	KWT	117	73.28	62.63	58.1	49.66	25.69	133.36	21.96	113.98	25.69	125.69	21.96	107.43
Laos	LAO	11.7	28.39	242.61	20.99	179.38	5.2	57.66	44.41	492.83	5.2	57.66	44.41	492.83
Lebanon	LBN	24.8	18.98	76.54	14.54	58.63	5.06	36.57	20.38	147.44	5.25	36.55	21.17	147.39
Liberia	LBR	3.03	42.35	1397.82	30.61	1010.26	5.54	88.83	182.93	2931.55	4.91	88.83	162.08	2931.55
Libya	LBY	96.7	32.79	33.9	16.96	17.53	-16.84	95.44	-17.41	98.69	-16.84	95.44	-17.41	98.69
Saint Lucia	LCA	0.71	0.64	90.4	0.52	73.52	0.27	1.12	37.48	157.2	0.24	1.12	34.01	157.04
Liechtenstein	LIE	0.24	-0.15	-63.24	-0.26	-107.63	-0.49	0.27	-202.39	112.44	-0.49	0.27	-202.39	110.99
Sri Lanka	LKA	25.1	27.3	108.76	13.01	51.84	-17.49	83.84	-69.67	334.01	-9.94	82.69	-39.62	329.43
Lesotho	LSO	4.5	8.97	199.43	7.16	159.16	3.29	16.14	73.21	358.77	3.29	14.16	73.21	314.68
Lithuania	LTU	21.3	7.37	34.61	3.88	18.23	-3.56	21.18	-16.74	99.43	-3.56	21.09	-16.74	99
Luxembourg	LUX	12.3	-1.24	-10.05	-3.46	-28.12	-8.2	7.56	-66.69	61.47	-8.2	7.83	-66.69	63.69
Latvia	LVA	12.8	2.85	22.28	1.11	8.69	-2.6	9.74	-20.34	76.1	-2.6	10.01	-20.34	78.23
Macao	MAC	1.81	-11.61	-641.25	-15.16	-837.5	-22.74	2.45	-1256.45	135.41	-22.74	2.45	-1256.45	135.41
Morocco	MAR	101	147.35	145.89	129.06	127.78	90	219.75	89.11	217.58	89.63	219.4	88.74	217.23
Monaco	MCO	0.15	-0.27	-177.23	-0.41	-265.02	-0.7	0.26	-452.41	170.17	-0.7	0.26	-452.41	169.14
Moldova	MDA	14.7	13.51	91.89	10.8	73.49	5.03	24.21	34.21	164.71	5.7	24.21	38.81	164.71
Madagascar	MDG	30.9	238.06	770.41	166.93	540.24	15.1	519.52	48.88	1681.31	15.1	519.52	48.88	1681.31
Maldives	MDV	1.01	0.72	70.9	0.29	28.62	-0.62	2.41	-61.64	238.23	-0.39	2.4	-38.37	238.1
Mexico	MEX	689	451.04	65.46	373.4	54.19	207.64	758.32	30.14	110.06	207.64	713.75	30.14	103.59
Marshall Islands	MHL	0.18	0.23	129.06	0.2	114.74	0.15	0.33	84.17	185.74	0.15	0.33	85.07	185.13
North Macedonia	MKD	13.8	10.56	76.5	9.23	66.88	6.4	15.81	46.36	114.54	6.38	15.77	46.24	114.31
Mali	MLI	54.3	181.99	335.16	143.73	264.7	62.05	333.42	114.27	614.03	52.43	333.42	96.56	614.03
Malta	MLT	2.97	0.82	27.57	0.34	11.42	-0.68	2.72	-23.06	91.5	-0.5	2.77	-16.81	93.15
Myanmar	MMR	105	104.37	99.4	90.36	86.05	60.44	159.84	57.56	152.23	60.44	154.17	57.56	146.83
Montenegro	MNE	5.03	2.96	58.92	2.62	52.1	1.89	4.32	37.53	85.93	1.89	4.32	37.53	85.93
Mongolia	MNG	26	29.72	114.32	22.14	85.16	5.96	59.73	22.91	229.73	7.57	59.73	29.13	229.73
Mozambique	MOZ	34.7	193.65	558.07	142.58	410.9	33.57	395.74	96.74	1140.47	32.61	395.74	93.97	1140.47
Mauritania	MRT	8.68	13.06	150.4	11.21	129.1	7.26	20.37	83.62	234.71	6.79	20.3	78.18	233.92
Mauritius	MUS	6.73	6.75	100.34	5.72	85.02	3.52	10.83	52.32	160.96	3.31	10.78	49.21	160.12
Malawi	MWI	9.61	185.44	1929.65	130.4	1356.88	12.89	403.27	134.14	4196.38	10.32	403.27	107.43	4196.38
Malaysia	MYS	338	176.23	52.14	135.22	40.01	47.69	338.49	14.11	100.14	60.54	326.44	17.91	96.58
Namibia	NAM	12.9	12.59	97.58	10.83	83.96	7.08	19.54	54.9	151.45	7.1	19.54	55.07	151.45
Niger	NER	20.9	281.59	1347.31	200.82	960.85	28.39	601.23	135.85	2876.71	22.97	601.23	109.9	2876.71
Nigeria	NGA	302	876.44	290.21	679.59	225.03	259.35	1655.48	85.88	548.17	235.48	1655.48	77.97	548.17
Nicaragua	NIC	14.7	23.71	161.27	20.84	141.77	14.72	35.05	100.13	238.45	13.97	35.05	95.01	238.45
Netherlands	NLD	215	4.4	2.05	-27.31	-12.7	-95.01	129.9	-44.19	60.42	-95.01	130.98	-44.19	60.92
Norway	NOR	56.3	-14.47	-25.7	-28.4	-50.45	-58.15	40.67	-103.28	72.24	-58.15	41.43	-103.28	73.58
Nepal	NPL	35.1	181.35	516.68	129.67	369.44	19.35	385.87	55.13	1099.36	19.35	385.87	55.13	1099.36
Nauru	NRU	0.04	0.02	39.55	0.01	21.4	-0.01	0.05	-17.34	111.36	0	0.05	0	110.41
New Zealand	NZL	79.4	32.61	41.07	26.28	33.1	12.76	57.67	16.07	72.63	12.76	58.31	16.07	73.44
Oman	OMN	74.6	56.96	76.36	46.41	62.21	23.87	98.74	32	132.36	24.22	97.56	32.46	130.77
Pakistan	PAK	368	705.43	191.69	532.48	144.7	163.28	1389.87	44.37	377.68	163.28	1292.08	44.37	351.11
Panama	PAN	13.8	7.01	50.77	2.75	19.93	-6.34	23.85	-45.92	172.84	-6.34	23.85	-45.92	172.81
Peru	PER	101	118.25	117.08	97.99	97.02	54.72	198.46	54.18	196.49	54.72	198.39	54.18	196.43
Philippines	PHL	173	280.53	162.16	203.24	117.48	38.23	586.43	22.1	338.98	46.68	585.63	26.98	338.52
Palau	PLW	0.26	0.2	77.52	0.18	69.16	0.13	0.28	51.31	110.61	0.13	0.28	51.31	110.61
Papua New Guinea	PNG	11.7	21.54	184.11	16.3	139.33	5.12	42.27	43.74	361.32	5.12	42.27	43.74	361.26
Poland	POL	417	181.76	43.59	152.57	36.59	90.27	297.26	21.65	71.29	90.27	297.83	21.65	71.42
North Korea	PRK	92.8	100.33	108.12	87.32	94.1	59.55	151.82	64.17	163.59	60.49	150.31	65.19	161.97
Portugal	PRT	69.7	20.65	29.63	9.5	13.62	-14.33	64.81	-20.55	92.99	-13.54	65.04	-19.42	93.32
Paraguay	PRY	46.4	53.11	114.46	43.24	93.18	22.16	92.19	47.76	198.68	22.89	92.19	49.33	198.68
Qatar	QAT	134	111.88	83.49	82.73	61.74	20.51	227.23	15.31	169.57	21.14	227.23	15.77	169.57
Romania	ROU	125	33.84	27.07	18.63	14.9	-13.86	94.07	-11.09	75.25	-13.86	106.15	-11.09	84.92
Russian Federation	RUS	2090	944.3	45.18	742.51	35.53	311.74	1742.88	14.92	83.39	319.51	1740.92	15.29	83.3
Rwanda	RWA	6.68	162.12	2426.9	112.03	1677.12	5.11	360.33	76.51	5394.14	4.74	360.33	71.01	5394.14
Saudi Arabia	SAU	576	388.1	67.38	325.15	56.45	190.78	637.2	33.12	110.62	191.07	637.2	33.17	110.62
Sudan	SDN	100	-11.8	-11.8	-58.88	-58.88	-159.38	174.5	-159.38	174.5	-152.17	174.5	-152.17	174.5
Senegal	SEN	22.6	82.67	365.82	61.36	271.5	15.85	167.03	70.15	739.09	14.8	167.03	65.49	739.09
Singapore	SGP	55.5	-0.97	-1.74	-17.38	-31.31	-52.4	63.97	-94.42	115.26	-50.12	63.72	-90.31	114.81
Saint Helena, Ascension and Tristan da Cunha	SHN	0.01	0.01	83.38	0.01	80.69	0.01	0.01	74.94	94.04	0.01	0.01	74.94	94.04
Solomon Islands	SLB	0.38	0.65	169.61	0.56	146.55	0.37	0.99	97.31	260.88	0.37	0.99	97.31	260.88
Sierra Leone	SLE	5.6	39.55	706.25	28.88	515.65	6.09	81.79	108.77	1460.53	5.14	81.79	91.76	1460.53
El Salvador	SLV	11.5	11.85	103.07	8.41	73.14	1.06	25.48	9.24	221.53	1.06	25.4	9.24	220.91
San Marino	SMR	0.26	0.07	26.68	0.01	5.49	-0.1	0.29	-39.76	110.56	-0.1	0.29	-39.76	110.56
Somalia	SOM	27	187.96	696.16	132.93	492.33	15.45	405.76	57.21	1502.81	15.45	405.76	57.21	1502.81
Serbia	SRB	68.3	50.64	74.15	42.68	62.49	25.68	82.15	37.6	120.28	25.68	82.15	37.6	120.28
South Sudan	SSD	52.6	61	115.97	55.87	106.22	44.94	81.28	85.43	154.52	44.94	81.28	85.43	154.52
Sao Tome and Principe	STP	0.17	0.01	3.22	-0.38	-219.42	-1.19	1.52	-694.71	884.32	-1.19	1.52	-694.71	884.32
Suriname	SUR	3.32	3.45	103.82	2.86	86.09	1.6	5.78	48.24	173.98	1.68	5.78	50.69	173.98
Slovakia	SVK	46.5	12.98	27.9	7.25	15.58	-4.98	35.65	-10.72	76.67	-4.98	36	-10.72	77.42
Slovenia	SVN	20.3	2.88	14.17	0.55	2.69	-4.43	12.09	-21.8	59.57	-4.43	12.6	-21.8	62.07
Sweden	SWE	67.8	-29.04	-42.82	-52.12	-76.87	-101.4	62.32	-149.56	91.92	-101.4	62.97	-149.56	92.88
Swaziland	SWZ	2.51	2.8	111.48	2.01	80.21	0.34	5.9	13.45	235.23	0.36	5.9	14.29	235.23
Seychelles	SYC	0.56	0.58	103.84	0.48	85.22	0.25	0.99	45.45	177.55	0.21	0.99	38.24	177.55
Syrian Arab Republic	SYR	83.9	35.74	42.6	-2.87	-3.42	-85.28	188.52	-101.65	224.7	-85.28	188.16	-101.65	224.27
Turks and Caicos Islands	TCA	0.21	0.18	86.94	0.18	84.78	0.17	0.2	80.17	95.5	0.17	0.2	80.17	95.5
Chad	TCD	26	91.56	352.14	74.68	287.21	38.64	158.36	148.61	609.09	28.54	158.36	109.77	609.09
Togo	TGO	10.9	95.7	877.95	67.67	620.87	7.86	206.59	72.07	1895.34	7.22	206.59	66.2	1895.34
Thailand	THA	419	288.71	68.91	247.3	59.02	158.89	452.61	37.92	108.02	166.12	443.85	39.65	105.93
Tajikistan	TJK	9.67	17.04	176.22	13.36	138.21	5.52	31.59	57.06	326.65	5.51	31.59	57.03	326.65
Tokelau	TKL	0	0	224.66	0	208.46	0	0	173.88	288.76	0	0	173.88	288.76
Turkmenistan	TKM	76	101.08	133	76.68	100.9	24.6	197.63	32.37	260.04	24.81	196.79	32.64	258.94
Timor-Leste	TLS	2.43	5.07	208.67	4.34	178.66	2.78	7.96	114.6	327.43	2.3	7.96	94.85	327.43
Tonga	TON	0.24	0.28	116.94	0.19	79.21	0	0.64	-1.34	266.26	0	0.64	-1.34	264.66
Trinidad and Tobago	TTO	83.2	43.68	52.5	33.37	40.11	11.36	84.48	13.66	101.53	11.51	83.8	13.83	100.72
Tunisia	TUN	39.7	41.44	104.39	35.46	89.33	22.69	65.11	57.17	164.02	25.27	64.02	63.66	161.25
Turkey	TUR	405	363.23	89.69	299.07	73.84	162.1	617.14	40.03	152.38	188.64	615.85	46.58	152.06
Tuvalu	TUV	0.02	0.03	178.41	0.03	154.07	0.02	0.05	102.11	274.75	0.02	0.05	102.43	274.09
Taiwan	TWN	301	289.92	96.32	204.63	67.98	22.55	627.46	7.49	208.46	22.55	627.46	7.49	208.46
Tanzania	TZA	75.4	432.45	573.55	319.19	423.33	77.39	880.7	102.64	1168.04	68.13	880.7	90.36	1168.04
Uganda	UGA	39.8	271.05	681.02	198.16	497.89	42.57	559.49	106.96	1405.75	39.2	559.49	98.5	1405.75
Ukraine	UKR	421	193.03	45.85	142.04	33.74	33.18	394.84	7.88	93.79	33.18	395.48	7.88	93.94
Uruguay	URY	33.9	24.57	72.48	20.04	59.11	10.36	42.52	30.55	125.42	10.36	42.52	30.55	125.42
United States	USA	7030	956.56	13.61	117.79	1.68	-1672.76	4275.92	-23.79	60.82	-1548.68	5856.85	-22.03	83.31
Uzbekistan	UZB	220	256.59	116.63	208.46	94.76	105.73	447.04	48.06	203.2	105.9	447.04	48.14	203.2
Holy See	VAT	0.01	0	60.63	0	59.2	0	0	56.15	66.3	0	0	56.15	66.3
Saint Vincent and the Grenadines	VCT	0.33	0.22	68.09	0.15	46.14	0	0.51	-0.72	154.97	0	0.49	-0.72	150.67
Venezuela	VEN	279	220.48	79.02	180.12	64.56	93.96	380.19	33.68	136.27	93.96	373.45	33.68	133.85
Virgin Islands, British	VGB	0.19	0.14	75.91	0.14	74.07	0.13	0.16	70.14	83.2	0.13	0.16	70.14	83.2
Viet Nam	VNM	282	357.04	126.61	321	113.83	244.06	499.67	86.55	177.19	222.11	499.27	78.76	177.05
Vanuatu	VUT	0.64	1.2	187.65	0.96	149.96	0.44	2.15	69.5	336.8	0.43	2.15	67.75	336.8
Samoa	WSM	0.42	0.48	114.28	0.4	95.43	0.23	0.79	55.17	188.91	0.23	0.76	55.17	181.48
Yemen	YEM	36.8	109.06	296.36	89.29	242.64	47.09	187.29	127.96	508.95	46.44	187.29	126.2	508.95
South Africa	ZAF	536	324.09	60.46	260.68	48.63	125.3	575.04	23.38	107.28	125.34	575.05	23.39	107.29
Zambia	ZMB	36.4	103.31	283.83	77.07	211.73	21.04	207.18	57.8	569.19	21.04	207.18	57.8	569.19
Zimbabwe	ZWE	22.3	121.08	542.97	83.97	376.55	4.75	267.95	21.29	1201.57	4.75	267.95	21.29	1201.57
